# Supplementary material for: Genomic Breeding for Diameter Growth and Tolerance to Leptocybe Gall Wasp and Botryosphaeria/Teratosphaeria Fungal Disease Complex in Eucalyptus grandis
Source: Front Plant Sci. 2021 Feb 26;12:638969. doi: 10.3389/fpls.2021.638969 (PMC7952757; doi:10.3389/fpls.2021.638969)
Supplement: Supplementary file 4 [file Table_1.XLSX]

## Sheet: Pedigree
SNP_ID	TREE_ID	SEED	POLLEN	GENERATION
	1	0	0	0
	2	0	0	0
	3	0	0	0
	4	1	0	0
	5	0	0	0
	6	0	0	0
	7	0	0	0
	8	0	0	0
	9	0	0	0
	10	0	0	0
	11	0	0	0
	12	0	0	0
	13	0	0	0
	14	0	0	0
	15	0	0	0
	16	0	0	0
	17	0	0	0
	18	0	0	0
	19	0	0	0
	20	0	0	0
	21	0	0	0
	22	0	0	0
	23	0	0	0
	24	0	0	0
	25	0	0	0
	26	0	0	0
	27	0	0	0
	28	0	0	0
	29	0	0	0
	30	0	0	0
	31	0	0	0
	32	0	0	0
	33	0	0	0
	34	0	0	0
	35	3	0	0
	36	4	0	0
	37	4	0	0
	38	5	0	0
	39	5	0	0
	40	10	0	0
	41	11	0	0
	42	12	0	0
	43	13	0	0
	44	14	0	0
	45	15	0	0
	46	18	0	0
	47	18	0	0
	48	19	0	0
	49	19	0	0
	50	20	0	0
	51	20	0	0
	52	21	0	0
	53	22	0	0
	54	24	0	0
	55	24	0	0
	56	25	0	0
	57	0	0	0
	58	26	0	0
	59	27	0	0
	60	27	0	0
	61	27	0	0
	62	30	0	0
	63	0	0	0
	64	0	0	0
	65	0	0	0
	66	0	0	0
	67	0	0	0
	68	0	0	0
	69	0	0	0
	70	0	0	0
	71	0	0	0
	72	0	0	0
	73	0	0	0
	74	0	0	0
	75	0	0	0
	76	0	0	0
	77	0	0	0
	78	0	0	0
	79	0	0	0
	80	0	0	0
	81	0	0	0
	82	0	0	0
	83	0	0	0
	84	0	0	0
	85	0	0	0
	86	0	0	0
	87	0	0	0
	88	0	0	0
	89	0	0	0
	90	0	0	0
	91	0	0	0
	92	0	0	0
	93	0	0	0
	94	0	0	0
	95	0	0	0
	96	92	0	1
	97	73	0	1
	98	69	0	1
	99	68	0	1
	100	67	0	1
	101	82	0	1
	102	58	0	4
	103	37	0	4
	104	77	0	1
	105	87	0	1
	106	71	0	1
	107	28	0	3
	108	35	0	4
	109	54	0	4
	110	94	0	1
	111	2	0	2
	112	46	0	4
	113	85	0	1
	114	34	0	3
	115	74	0	1
	116	42	0	4
	117	27	0	3
	118	39	0	4
	119	13	0	3
	120	53	0	4
	121	1	0	2
	122	91	0	1
	123	50	0	4
	124	88	0	1
	125	18	0	3
	126	62	0	4
	127	17	0	3
	128	59	0	4
	129	65	0	1
	130	41	0	4
	131	90	0	1
	132	66	0	1
	133	31	0	3
	134	32	0	3
	135	95	0	1
	136	86	0	1
	137	40	0	4
	138	48	0	4
	139	64	0	1
	140	79	0	1
	141	80	0	1
	142	35	0	3
	143	76	0	1
	144	15	0	3
	145	84	0	1
	146	12	0	3
	147	21	0	3
	148	44	0	4
	149	83	0	1
	150	24	0	3
	151	52	0	4
	152	39	0	4
	153	72	0	1
	154	16	0	3
	155	63	0	1
	156	55	0	4
	157	57	0	4
	158	60	0	4
	159	75	0	1
	160	45	0	4
	161	36	0	4
	162	56	0	4
	163	43	0	4
	164	49	0	4
	165	70	0	1
	166	51	0	4
	167	47	0	4
	168	81	0	1
	169	57	0	4
	170	89	0	1
	171	7	0	3
	172	47	0	4
	173	1	0	2
	174	69	0	1
	175	43	0	4
	176	40	0	4
	177	67	0	1
	178	87	0	1
	179	60	0	4
	180	90	0	1
	181	53	0	4
	182	56	0	4
	183	14	0	3
	184	34	0	3
	185	18	0	3
	186	23	0	3
	187	95	0	1
	188	37	0	4
	189	77	0	1
	190	94	0	1
	191	61	0	4
	192	39	0	4
	193	63	0	1
	194	51	0	4
	195	48	0	4
	196	45	0	4
	197	44	0	4
	198	2	0	2
	199	92	0	1
	200	55	0	4
	201	44	0	4
	202	84	0	1
	203	38	0	4
	204	29	0	3
	205	50	0	4
	206	62	0	4
	207	30	0	3
	208	4	0	3
	209	50	0	4
	210	52	0	4
	211	41	0	4
	212	17	0	3
	213	93	0	1
	214	36	0	4
	215	86	0	1
	216	91	0	1
	217	83	0	1
	218	85	0	1
	219	76	0	1
	220	64	0	1
	221	13	0	3
	222	59	0	4
	223	82	0	1
	224	31	0	3
	225	46	0	4
	226	70	0	1
	227	57	0	4
	228	78	0	1
	229	11	0	3
	230	34	0	3
	231	54	0	4
	232	65	0	1
	233	52	0	4
	234	60	0	4
	235	73	0	1
	236	53	0	4
	237	12	0	3
	238	79	0	1
	239	26	0	3
	240	58	0	4
	241	8	0	3
	242	47	0	4
	243	57	0	4
	244	66	0	1
	245	59	0	4
	246	54	0	4
	247	56	0	4
	248	75	0	1
	249	72	0	1
	250	62	0	4
	251	10	0	3
	252	33	0	3
	253	42	0	4
	254	24	0	3
	255	43	0	4
	256	3	0	3
	257	37	0	4
	258	89	0	1
	259	16	0	3
	260	49	0	4
	261	28	0	3
	262	45	0	4
	263	49	0	4
	264	55	0	4
	265	35	0	4
	266	24	0	3
	267	81	0	1
	268	39	0	4
	269	88	0	1
	270	51	0	4
	271	28	0	3
	272	35	0	3
	273	74	0	1
	274	71	0	1
	275	31	0	3
	276	37	0	4
	277	81	0	1
	278	90	0	1
	279	54	0	4
	280	61	0	4
	281	72	0	1
	282	29	0	3
	283	59	0	4
	284	79	0	1
	285	80	0	1
	286	68	0	1
	287	78	0	1
	288	36	0	4
	289	63	0	1
	290	75	0	1
	291	76	0	1
	292	91	0	1
	293	48	0	4
	294	32	0	3
	295	2	0	2
	296	54	0	4
	297	39	0	4
	298	94	0	1
	299	7	0	3
	300	35	0	4
	301	30	0	3
	302	50	0	4
	303	65	0	1
	304	56	0	4
	305	71	0	1
	306	57	0	4
	307	86	0	1
	308	24	0	3
	309	36	0	4
	310	93	0	1
	311	35	0	3
	312	70	0	1
	313	41	0	4
	314	95	0	1
	315	14	0	3
	316	55	0	4
	317	49	0	4
	318	24	0	3
	319	42	0	4
	320	53	0	4
	321	85	0	1
	322	31	0	3
	323	28	0	3
	324	62	0	4
	325	48	0	4
	326	1	0	2
	327	19	0	3
	328	52	0	4
	329	9	0	3
	330	77	0	1
	331	46	0	4
	332	73	0	1
	333	53	0	4
	334	21	0	3
	335	5	0	3
	336	82	0	1
	337	26	0	3
	338	57	0	4
	339	43	0	4
	340	34	0	3
	341	88	0	1
	342	40	0	4
	343	66	0	1
	344	25	0	3
	345	39	0	4
	346	44	0	4
	347	92	0	1
	348	35	0	4
	349	40	0	4
	350	60	0	4
	351	45	0	4
	352	62	0	4
	353	74	0	1
	354	41	0	4
	355	51	0	4
	356	51	0	4
	357	89	0	1
	358	46	0	4
	359	50	0	4
	360	44	0	4
	361	15	0	3
	362	43	0	4
	363	69	0	1
	364	47	0	4
	365	6	0	3
	366	60	0	4
	367	42	0	4
	368	85	0	1
	369	47	0	4
	370	93	0	1
	371	56	0	4
	372	52	0	4
	373	41	0	4
	374	49	0	4
	375	32	0	3
	376	20	0	3
	377	92	0	1
	378	18	0	3
	379	81	0	1
	380	44	0	4
	381	3	0	3
	382	19	0	3
	383	42	0	4
	384	67	0	1
	385	1	0	2
	386	70	0	1
	387	31	0	3
	388	90	0	1
	389	10	0	3
	390	76	0	1
	391	2	0	2
	392	42	0	4
	393	79	0	1
	394	78	0	1
	395	74	0	1
	396	43	0	4
	397	58	0	4
	398	80	0	1
	399	7	0	3
	400	23	0	3
	401	72	0	1
	402	41	0	4
	403	5	0	3
	404	45	0	4
	405	28	0	3
	406	55	0	4
	407	50	0	4
	408	34	0	3
	409	36	0	4
	410	45	0	4
	411	53	0	4
	412	31	0	3
	413	65	0	1
	414	59	0	4
	415	38	0	4
	416	22	0	3
	417	16	0	3
	418	50	0	4
	419	40	0	4
	420	51	0	4
	421	57	0	4
	422	54	0	4
	423	24	0	3
	424	13	0	3
	425	36	0	4
	426	71	0	1
	427	77	0	1
	428	48	0	4
	429	28	0	3
	430	69	0	1
	431	88	0	1
	432	95	0	1
	433	61	0	4
	434	6	0	3
	435	56	0	4
	436	57	0	4
	437	86	0	1
	438	66	0	1
	439	82	0	1
	440	33	0	3
	441	46	0	4
	442	62	0	4
	443	49	0	4
	444	73	0	1
	445	24	0	3
	446	37	0	4
	447	35	0	4
	448	60	0	4
	449	35	0	4
	450	39	0	4
	451	63	0	1
	452	84	0	1
	453	52	0	4
	454	47	0	4
	455	48	0	4
	456	87	0	1
	457	40	0	4
	458	94	0	1
	459	68	0	1
	460	53	0	4
	461	4	0	3
	462	51	0	4
	463	8	0	3
	464	37	0	4
	465	83	0	1
	466	35	0	3
	467	51	0	4
	468	6	0	3
	469	26	0	3
	470	17	0	3
	471	37	0	4
	472	47	0	4
	473	37	0	4
	474	86	0	1
	475	80	0	1
	476	28	0	3
	477	39	0	4
	478	60	0	4
	479	93	0	1
	480	90	0	1
	481	34	0	3
	482	44	0	4
	483	48	0	4
	484	40	0	4
	485	59	0	4
	486	49	0	4
	487	18	0	3
	488	13	0	3
	489	87	0	1
	490	27	0	3
	491	92	0	1
	492	72	0	1
	493	20	0	3
	494	74	0	1
	495	1	0	2
	496	58	0	4
	497	71	0	1
	498	81	0	1
	499	82	0	1
	500	94	0	1
	501	24	0	3
	502	78	0	1
	503	34	0	3
	504	40	0	4
	505	83	0	1
	506	56	0	4
	507	85	0	1
	508	36	0	4
	509	79	0	1
	510	75	0	1
	511	68	0	1
	512	52	0	4
	513	11	0	3
	514	38	0	4
	515	50	0	4
	516	41	0	4
	517	66	0	1
	518	2	0	2
	519	43	0	4
	520	60	0	4
	521	89	0	1
	522	23	0	3
	523	88	0	1
	524	35	0	3
	525	53	0	4
	526	61	0	4
	527	47	0	4
	528	57	0	4
	529	24	0	3
	530	29	0	3
	531	69	0	1
	532	9	0	3
	533	46	0	4
	534	84	0	1
	535	48	0	4
	536	28	0	3
	537	43	0	4
	538	62	0	4
	539	54	0	4
	540	42	0	4
	541	35	0	4
	542	15	0	3
	543	45	0	4
	544	10	0	3
	545	51	0	4
	546	95	0	1
	547	49	0	4
	548	4	0	3
	549	46	0	4
	550	31	0	3
	551	36	0	4
	552	70	0	1
	553	5	0	3
	554	19	0	3
	555	41	0	4
	556	55	0	4
	557	77	0	1
	558	45	0	4
	559	55	0	4
	560	56	0	4
	561	91	0	1
	562	52	0	4
	563	53	0	4
	564	64	0	1
	565	50	0	4
	566	54	0	4
	567	42	0	4
	568	71	0	1
	569	37	0	4
	570	59	0	4
	571	83	0	1
	572	13	0	3
	573	82	0	1
	574	42	0	4
	575	54	0	4
	576	30	0	3
	577	41	0	4
	578	35	0	3
	579	47	0	4
	580	60	0	4
	581	90	0	1
	582	4	0	3
	583	66	0	1
	584	41	0	4
	585	8	0	3
	586	87	0	1
	587	55	0	4
	588	81	0	1
	589	29	0	3
	590	76	0	1
	591	19	0	3
	592	60	0	4
	593	52	0	4
	594	43	0	4
	595	78	0	1
	596	53	0	4
	597	48	0	4
	598	58	0	4
	599	52	0	4
	600	89	0	1
	601	24	0	3
	602	46	0	4
	603	49	0	4
	604	56	0	4
	605	11	0	3
	606	3	0	3
	607	84	0	1
	608	53	0	4
	609	45	0	4
	610	61	0	4
	611	65	0	1
	612	36	0	4
	613	45	0	4
	614	10	0	3
	615	31	0	3
	616	44	0	4
	617	70	0	1
	618	2	0	2
	619	63	0	1
	620	35	0	4
	621	23	0	3
	622	85	0	1
	623	44	0	4
	624	86	0	1
	625	32	0	3
	626	80	0	1
	627	51	0	4
	628	92	0	1
	629	35	0	4
	630	39	0	4
	631	7	0	3
	632	79	0	1
	633	91	0	1
	634	64	0	1
	635	55	0	4
	636	20	0	3
	637	5	0	3
	638	49	0	4
	639	51	0	4
	640	88	0	1
	641	62	0	4
	642	47	0	4
	643	17	0	3
	644	1	0	2
	645	69	0	1
	646	73	0	1
	647	18	0	3
	648	9	0	3
	649	24	0	3
	650	94	0	1
	651	72	0	1
	652	22	0	3
	653	36	0	4
	654	50	0	4
	655	40	0	4
	656	38	0	4
	657	67	0	1
	658	37	0	4
	659	34	0	3
	660	28	0	3
	661	93	0	1
	662	74	0	1
	663	31	0	3
	664	12	0	3
	665	57	0	4
	666	21	0	3
	667	54	0	4
	668	31	0	3
	669	35	0	4
	670	86	0	1
	671	64	0	1
	672	31	0	3
	673	55	0	4
	674	78	0	1
	675	25	0	3
	676	51	0	4
	677	54	0	4
	678	52	0	4
	679	39	0	4
	680	24	0	3
	681	66	0	1
	682	19	0	3
	683	87	0	1
	684	93	0	1
	685	27	0	3
	686	63	0	1
	687	42	0	4
	688	42	0	4
	689	62	0	4
	690	69	0	1
	691	13	0	3
	692	32	0	3
	693	44	0	4
	694	70	0	1
	695	46	0	4
	696	24	0	3
	697	57	0	4
	698	35	0	3
	699	58	0	4
	700	60	0	4
	701	80	0	1
	702	4	0	3
	703	83	0	1
	704	94	0	1
	705	49	0	4
	706	28	0	3
	707	53	0	4
	708	56	0	4
	709	36	0	4
	710	59	0	4
	711	34	0	3
	712	72	0	1
	713	75	0	1
	714	52	0	4
	715	79	0	1
	716	82	0	1
	717	47	0	4
	718	37	0	4
	719	50	0	4
	720	43	0	4
	721	85	0	1
	722	55	0	4
	723	14	0	3
	724	40	0	4
	725	18	0	3
	726	40	0	4
	727	36	0	4
	728	12	0	3
	729	84	0	1
	730	73	0	1
	731	34	0	3
	732	11	0	3
	733	45	0	4
	734	33	0	3
	735	1	0	2
	736	48	0	4
	737	60	0	4
	738	95	0	1
	739	76	0	1
	740	59	0	4
	741	43	0	4
	742	68	0	1
	743	91	0	1
	744	71	0	1
	745	22	0	3
	746	92	0	1
	747	57	0	4
	748	39	0	4
	749	48	0	4
	750	37	0	4
	751	20	0	3
	752	61	0	4
	753	2	0	2
	754	44	0	4
	755	67	0	1
	756	90	0	1
	757	41	0	4
	758	53	0	4
	759	77	0	1
	760	8	0	3
	761	89	0	1
	762	74	0	1
	763	41	0	4
	764	12	0	3
	765	52	0	4
	766	50	0	4
	767	51	0	4
	768	71	0	1
	769	9	0	3
	770	39	0	4
	771	7	0	3
	772	5	0	3
	773	65	0	1
	774	58	0	4
	775	35	0	4
	776	47	0	4
	777	77	0	1
	778	34	0	3
	779	53	0	4
	780	48	0	4
	781	51	0	4
	782	40	0	4
	783	16	0	3
	784	84	0	1
	785	83	0	1
	786	46	0	4
	787	53	0	4
	788	40	0	4
	789	67	0	1
	790	49	0	4
	791	50	0	4
	792	91	0	1
	793	49	0	4
	794	36	0	4
	795	37	0	4
	796	28	0	3
	797	41	0	4
	798	3	0	3
	799	90	0	1
	800	30	0	3
	801	85	0	1
	802	57	0	4
	803	62	0	4
	804	88	0	1
	805	76	0	1
	806	25	0	3
	807	13	0	3
	808	38	0	4
	809	70	0	1
	810	81	0	1
	811	2	0	2
	812	27	0	3
	813	26	0	3
	814	89	0	1
	815	44	0	4
	816	55	0	4
	817	74	0	1
	818	59	0	4
	819	11	0	3
	820	60	0	4
	821	87	0	1
	822	42	0	4
	823	59	0	4
	824	15	0	3
	825	73	0	1
	826	42	0	4
	827	54	0	4
	828	61	0	4
	829	46	0	4
	830	22	0	3
	831	86	0	1
	832	47	0	4
	833	24	0	3
	834	80	0	1
	835	1	0	2
	836	75	0	1
	837	64	0	1
	838	31	0	3
	839	44	0	4
	840	35	0	3
	841	79	0	1
	842	39	0	4
	843	21	0	3
	844	19	0	3
	845	23	0	3
	846	92	0	1
	847	29	0	3
	848	43	0	4
	849	68	0	1
	850	34	0	3
	851	45	0	4
	852	31	0	3
	853	33	0	3
	854	55	0	4
	855	10	0	3
	856	69	0	1
	857	56	0	4
	858	18	0	3
	859	56	0	4
	860	72	0	1
	861	57	0	4
	862	48	0	4
	863	52	0	4
	864	95	0	1
	865	35	0	4
	866	24	0	3
	867	62	0	4
	868	8	0	3
	869	14	0	3
	870	82	0	1
	871	50	0	4
	872	46	0	4
	873	5	0	3
	874	77	0	1
	875	21	0	3
	876	27	0	3
	877	70	0	1
	878	41	0	4
	879	11	0	3
	880	66	0	1
	881	43	0	4
	882	57	0	4
	883	30	0	3
	884	41	0	4
	885	60	0	4
	886	56	0	4
	887	15	0	3
	888	63	0	1
	889	39	0	4
	890	35	0	4
	891	28	0	3
	892	20	0	3
	893	43	0	4
	894	56	0	4
	895	67	0	1
	896	54	0	4
	897	88	0	1
	898	84	0	1
	899	7	0	3
	900	45	0	4
	901	33	0	3
	902	4	0	3
	903	83	0	1
	904	42	0	4
	905	55	0	4
	906	18	0	3
	907	80	0	1
	908	59	0	4
	909	44	0	4
	910	68	0	1
	911	52	0	4
	912	53	0	4
	913	10	0	3
	914	47	0	4
	915	93	0	1
	916	73	0	1
	917	49	0	4
	918	75	0	1
	919	78	0	1
	920	46	0	4
	921	62	0	4
	922	58	0	4
	923	89	0	1
	924	17	0	3
	925	44	0	4
	926	51	0	4
	927	48	0	4
	928	42	0	4
	929	76	0	1
	930	86	0	1
	931	45	0	4
	932	87	0	1
	933	95	0	1
	934	85	0	1
	935	60	0	4
	936	47	0	4
	937	12	0	3
	938	51	0	4
	939	1	0	2
	940	2	0	2
	941	24	0	3
	942	29	0	3
	943	35	0	3
	944	24	0	3
	945	57	0	4
	946	19	0	3
	947	28	0	3
	948	22	0	3
	949	74	0	1
	950	40	0	4
	951	32	0	3
	952	36	0	4
	953	23	0	3
	954	69	0	1
	955	16	0	3
	956	54	0	4
	957	79	0	1
	958	26	0	3
	959	81	0	1
	960	53	0	4
	961	6	0	3
	962	94	0	1
	963	90	0	1
	964	34	0	3
	965	65	0	1
	966	37	0	4
	967	61	0	4
	968	14	0	3
	969	64	0	1
	970	62	0	4
	971	55	0	4
	972	31	0	3
	973	39	0	4
	974	37	0	4
	975	3	0	3
	976	71	0	1
	977	47	0	4
	978	91	0	1
	979	93	0	1
	980	35	0	4
	981	22	0	3
	982	74	0	1
	983	77	0	1
	984	9	0	3
	985	69	0	1
	986	13	0	3
	987	45	0	4
	988	53	0	4
	989	92	0	1
	990	28	0	3
	991	70	0	1
	992	87	0	1
	993	51	0	4
	994	35	0	4
	995	88	0	1
	996	31	0	3
	997	15	0	3
	998	57	0	4
	999	76	0	1
	1000	1	0	2
	1001	53	0	4
	1002	18	0	3
	1003	38	0	4
	1004	32	0	3
	1005	36	0	4
	1006	20	0	3
	1007	46	0	4
	1008	79	0	1
	1009	89	0	1
	1010	42	0	4
	1011	82	0	1
	1012	31	0	3
	1013	27	0	3
	1014	41	0	4
	1015	80	0	1
	1016	65	0	1
	1017	90	0	1
	1018	39	0	4
	1019	23	0	3
	1020	72	0	1
	1021	4	0	3
	1022	63	0	1
	1023	28	0	3
	1024	50	0	4
	1025	17	0	3
	1026	44	0	4
	1027	30	0	3
	1028	16	0	3
	1029	48	0	4
	1030	49	0	4
	1031	55	0	4
	1032	66	0	1
	1033	52	0	4
	1034	45	0	4
	1035	35	0	3
	1036	34	0	3
	1037	39	0	4
	1038	55	0	4
	1039	85	0	1
	1040	3	0	3
	1041	62	0	4
	1042	34	0	3
	1043	68	0	1
	1044	52	0	4
	1045	67	0	1
	1046	12	0	3
	1047	14	0	3
	1048	58	0	4
	1049	95	0	1
	1050	54	0	4
	1051	2	0	2
	1052	57	0	4
	1053	41	0	4
	1054	24	0	3
	1055	25	0	3
	1056	40	0	4
	1057	43	0	4
	1058	40	0	4
	1059	64	0	1
	1060	75	0	1
	1061	33	0	3
	1062	37	0	4
	1063	11	0	3
	1064	47	0	4
	1065	56	0	4
	1066	59	0	4
	1067	49	0	4
	1068	42	0	4
	1069	60	0	4
	1070	19	0	3
	1071	73	0	1
	1072	54	0	4
	1073	24	0	3
	1074	61	0	4
	1075	50	0	4
	1076	37	0	4
	1077	48	0	4
	1078	44	0	4
	1079	83	0	1
	1080	46	0	4
	1081	60	0	4
	1082	26	0	3
	1083	78	0	1
	1084	56	0	4
	1085	84	0	1
	1086	94	0	1
	1087	5	0	3
	1088	62	0	4
	1089	43	0	4
	1090	36	0	4
	1091	86	0	1
	1092	11	0	3
	1093	46	0	4
	1094	77	0	1
	1095	60	0	4
	1096	40	0	4
	1097	57	0	4
	1098	6	0	3
	1099	93	0	1
	1100	83	0	1
	1101	65	0	1
	1102	95	0	1
	1103	55	0	4
	1104	48	0	4
	1105	56	0	4
	1106	32	0	3
	1107	40	0	4
	1108	57	0	4
	1109	60	0	4
	1110	69	0	1
	1111	37	0	4
	1112	49	0	4
	1113	36	0	4
	1114	64	0	1
	1115	44	0	4
	1116	24	0	3
	1117	73	0	1
	1118	45	0	4
	1119	38	0	4
	1120	89	0	1
	1121	51	0	4
	1122	52	0	4
	1123	94	0	1
	1124	80	0	1
	1125	35	0	4
	1126	47	0	4
	1127	50	0	4
	1128	7	0	3
	1129	41	0	4
	1130	19	0	3
	1131	9	0	3
	1132	5	0	3
	1133	43	0	4
	1134	20	0	3
	1135	50	0	4
	1136	78	0	1
	1137	88	0	1
	1138	90	0	1
	1139	51	0	4
	1140	66	0	1
	1141	72	0	1
	1142	54	0	4
	1143	16	0	3
	1144	24	0	3
	1145	22	0	3
	1146	31	0	3
	1147	33	0	3
	1148	37	0	4
	1149	67	0	1
	1150	45	0	4
	1151	76	0	1
	1152	21	0	3
	1153	62	0	4
	1154	87	0	1
	1155	34	0	3
	1156	47	0	4
	1157	2	0	2
	1158	8	0	3
	1159	92	0	1
	1160	49	0	4
	1161	82	0	1
	1162	52	0	4
	1163	53	0	4
	1164	14	0	3
	1165	59	0	4
	1166	42	0	4
	1167	26	0	3
	1168	86	0	1
	1169	15	0	3
	1170	1	0	2
	1171	24	0	3
	1172	41	0	4
	1173	18	0	3
	1174	17	0	3
	1175	31	0	3
	1176	71	0	1
	1177	28	0	3
	1178	48	0	4
	1179	85	0	1
	1180	12	0	3
	1181	3	0	3
	1182	29	0	3
	1183	46	0	4
	1184	30	0	3
	1185	91	0	1
	1186	63	0	1
	1187	75	0	1
	1188	35	0	3
	1189	43	0	4
	1190	39	0	4
	1191	84	0	1
	1192	81	0	1
	1193	13	0	3
	1194	54	0	4
	1195	36	0	4
	1196	66	0	1
	1197	23	0	3
	1198	84	0	1
	1199	89	0	1
	1200	27	0	3
	1201	62	0	4
	1202	36	0	4
	1203	77	0	1
	1204	54	0	4
	1205	31	0	3
	1206	58	0	4
	1207	44	0	4
	1208	12	0	3
	1209	48	0	4
	1210	7	0	3
	1211	36	0	4
	1212	35	0	4
	1213	6	0	3
	1214	45	0	4
	1215	51	0	4
	1216	56	0	4
	1217	63	0	1
	1218	34	0	3
	1219	86	0	1
	1220	56	0	4
	1221	93	0	1
	1222	5	0	3
	1223	41	0	4
	1224	65	0	1
	1225	49	0	4
	1226	51	0	4
	1227	39	0	4
	1228	42	0	4
	1229	10	0	3
	1230	85	0	1
	1231	19	0	3
	1232	73	0	1
	1233	91	0	1
	1234	35	0	4
	1235	72	0	1
	1236	9	0	3
	1237	37	0	4
	1238	31	0	3
	1239	64	0	1
	1240	46	0	4
	1241	55	0	4
	1242	59	0	4
	1243	94	0	1
	1244	82	0	1
	1245	88	0	1
	1246	35	0	3
	1247	95	0	1
	1248	24	0	3
	1249	67	0	1
	1250	57	0	4
	1251	78	0	1
	1252	41	0	4
	1253	2	0	2
	1254	22	0	3
	1255	20	0	3
	1256	16	0	3
	1257	75	0	1
	1258	42	0	4
	1259	69	0	1
	1260	13	0	3
	1261	47	0	4
	1262	49	0	4
	1263	26	0	3
	1264	24	0	3
	1265	54	0	4
	1266	70	0	1
	1267	38	0	4
	1268	25	0	3
	1269	55	0	4
	1270	28	0	3
	1271	92	0	1
	1272	76	0	1
	1273	14	0	3
	1274	90	0	1
	1275	45	0	4
	1276	68	0	1
	1277	57	0	4
	1278	44	0	4
	1279	80	0	1
	1280	24	0	3
	1281	39	0	4
	1282	17	0	3
	1283	50	0	4
	1284	87	0	1
	1285	71	0	1
	1286	79	0	1
	1287	40	0	4
	1288	50	0	4
	1289	53	0	4
	1290	43	0	4
	1291	52	0	4
	1292	48	0	4
	1293	8	0	3
	1294	4	0	3
	1295	3	0	3
	1296	46	0	4
	1297	74	0	1
	1298	30	0	3
	1299	60	0	4
	1300	43	0	4
	1301	47	0	4
	1302	40	0	4
	1303	83	0	1
	1304	81	0	1
	1305	34	0	3
	1306	59	0	4
	1307	1	0	2
	1308	28	0	3
	1309	28	0	3
	1310	62	0	4
	1311	95	0	1
	1312	59	0	4
	1313	79	0	1
	1314	19	0	3
	1315	5	0	3
	1316	47	0	4
	1317	42	0	4
	1318	86	0	1
	1319	85	0	1
	1320	42	0	4
	1321	62	0	4
	1322	54	0	4
	1323	89	0	1
	1324	44	0	4
	1325	38	0	4
	1326	31	0	3
	1327	36	0	4
	1328	40	0	4
	1329	52	0	4
	1330	92	0	1
	1331	36	0	4
	1332	53	0	4
	1333	78	0	1
	1334	3	0	3
	1335	40	0	4
	1336	50	0	4
	1337	88	0	1
	1338	39	0	4
	1339	81	0	1
	1340	1	0	2
	1341	56	0	4
	1342	49	0	4
	1343	74	0	1
	1344	59	0	4
	1345	7	0	3
	1346	75	0	1
	1347	87	0	1
	1348	50	0	4
	1349	84	0	1
	1350	34	0	3
	1351	53	0	4
	1352	80	0	1
	1353	44	0	4
	1354	52	0	4
	1355	73	0	1
	1356	43	0	4
	1357	9	0	3
	1358	67	0	1
	1359	14	0	3
	1360	35	0	4
	1361	57	0	4
	1362	37	0	4
	1363	25	0	3
	1364	68	0	1
	1365	72	0	1
	1366	20	0	3
	1367	43	0	4
	1368	2	0	2
	1369	58	0	4
	1370	55	0	4
	1371	54	0	4
	1372	65	0	1
	1373	41	0	4
	1374	12	0	3
	1375	91	0	1
	1376	47	0	4
	1377	31	0	3
	1378	56	0	4
	1379	8	0	3
	1380	35	0	3
	1381	45	0	4
	1382	32	0	3
	1383	45	0	4
	1384	23	0	3
	1385	76	0	1
	1386	82	0	1
	1387	33	0	3
	1388	46	0	4
	1389	51	0	4
	1390	34	0	3
	1391	48	0	4
	1392	55	0	4
	1393	28	0	3
	1394	46	0	4
	1395	51	0	4
	1396	71	0	1
	1397	17	0	3
	1398	27	0	3
	1399	6	0	3
	1400	66	0	1
	1401	35	0	4
	1402	11	0	3
	1403	60	0	4
	1404	93	0	1
	1405	57	0	4
	1406	10	0	3
	1407	61	0	4
	1408	70	0	1
	1409	48	0	4
	1410	21	0	3
	1411	26	0	3
	1412	63	0	1
	1413	41	0	4
	1414	24	0	3
	1415	77	0	1
	1416	37	0	4
	1417	29	0	3
	1418	90	0	1
	1419	4	0	3
	1420	24	0	3
	1421	24	0	3
	1422	94	0	1
	1423	73	0	1
	1424	40	0	4
	1425	69	0	1
	1426	31	0	3
	1427	51	0	4
	1428	22	0	3
	1429	36	0	4
	1430	74	0	1
	1431	26	0	3
	1432	46	0	4
	1433	24	0	3
	1434	86	0	1
	1435	47	0	4
	1436	57	0	4
	1437	49	0	4
	1438	35	0	4
	1439	37	0	4
	1440	10	0	3
	1441	92	0	1
	1442	40	0	4
	1443	31	0	3
	1444	44	0	4
	1445	81	0	1
	1446	32	0	3
	1447	52	0	4
	1448	5	0	3
	1449	45	0	4
	1450	49	0	4
	1451	3	0	3
	1452	42	0	4
	1453	35	0	3
	1454	63	0	1
	1455	2	0	2
	1456	62	0	4
	1457	52	0	4
	1458	30	0	3
	1459	46	0	4
	1460	4	0	3
	1461	48	0	4
	1462	37	0	4
	1463	82	0	1
	1464	19	0	3
	1465	58	0	4
	1466	20	0	3
	1467	34	0	3
	1468	55	0	4
	1469	64	0	1
	1470	41	0	4
	1471	85	0	1
	1472	34	0	3
	1473	65	0	1
	1474	77	0	1
	1475	39	0	4
	1476	51	0	4
	1477	60	0	4
	1478	66	0	1
	1479	53	0	4
	1480	79	0	1
	1481	75	0	1
	1482	90	0	1
	1483	41	0	4
	1484	88	0	1
	1485	95	0	1
	1486	56	0	4
	1487	27	0	3
	1488	42	0	4
	1489	78	0	1
	1490	84	0	1
	1491	56	0	4
	1492	18	0	3
	1493	83	0	1
	1494	36	0	4
	1495	12	0	3
	1496	50	0	4
	1497	59	0	4
	1498	28	0	3
	1499	54	0	4
	1500	28	0	3
	1501	53	0	4
	1502	29	0	3
	1503	9	0	3
	1504	50	0	4
	1505	87	0	1
	1506	33	0	3
	1507	80	0	1
	1508	13	0	3
	1509	17	0	3
	1510	14	0	3
	1511	89	0	1
	1512	43	0	4
	1513	60	0	4
	1514	11	0	3
	1515	24	0	3
	1516	7	0	3
	1517	76	0	1
	1518	47	0	4
	1519	70	0	1
	1520	38	0	4
	1521	48	0	4
	1522	67	0	1
	1523	71	0	1
	1524	62	0	4
	1525	94	0	1
	1526	39	0	4
	1527	72	0	1
	1528	91	0	1
	1529	59	0	4
	1530	44	0	4
	1531	15	0	3
	1532	8	0	3
	1533	57	0	4
	1534	54	0	4
	1535	68	0	1
	1536	21	0	3
	1537	25	0	3
	1538	1	0	2
	1539	45	0	4
	1540	16	0	3
	1541	93	0	1
	1542	24	0	3
	1543	1	0	2
	1544	58	0	4
	1545	62	0	4
	1546	35	0	4
	1547	9	0	3
	1548	22	0	3
	1549	21	0	3
	1550	40	0	4
	1551	53	0	4
	1552	84	0	1
	1553	86	0	1
	1554	59	0	4
	1555	74	0	1
	1556	53	0	4
	1557	56	0	4
	1558	83	0	1
	1559	57	0	4
	1560	44	0	4
	1561	50	0	4
	1562	43	0	4
	1563	34	0	3
	1564	49	0	4
	1565	66	0	1
	1566	60	0	4
	1567	35	0	4
	1568	59	0	4
	1569	57	0	4
	1570	36	0	4
	1571	55	0	4
	1572	24	0	3
	1573	81	0	1
	1574	31	0	3
	1575	45	0	4
	1576	71	0	1
	1577	56	0	4
	1578	39	0	4
	1579	89	0	1
	1580	55	0	4
	1581	88	0	1
	1582	75	0	1
	1583	3	0	3
	1584	40	0	4
	1585	33	0	3
	1586	31	0	3
	1587	85	0	1
	1588	30	0	3
	1589	78	0	1
	1590	79	0	1
	1591	43	0	4
	1592	50	0	4
	1593	27	0	3
	1594	2	0	2
	1595	54	0	4
	1596	45	0	4
	1597	62	0	4
	1598	65	0	1
	1599	41	0	4
	1600	32	0	3
	1601	36	0	4
	1602	73	0	1
	1603	37	0	4
	1604	61	0	4
	1605	18	0	3
	1606	37	0	4
	1607	77	0	1
	1608	11	0	3
	1609	51	0	4
	1610	42	0	4
	1611	69	0	1
	1612	60	0	4
	1613	44	0	4
	1614	4	0	3
	1615	39	0	4
	1616	63	0	1
	1617	72	0	1
	1618	82	0	1
	1619	70	0	1
	1620	47	0	4
	1621	41	0	4
	1622	6	0	3
	1623	7	0	3
	1624	20	0	3
	1625	24	0	3
	1626	93	0	1
	1627	80	0	1
	1628	19	0	3
	1629	68	0	1
	1630	5	0	3
	1631	49	0	4
	1632	94	0	1
	1633	28	0	3
	1634	12	0	3
	1635	14	0	3
	1636	51	0	4
	1637	54	0	4
	1638	48	0	4
	1639	38	0	4
	1640	23	0	3
	1641	52	0	4
	1642	8	0	3
	1643	90	0	1
	1644	46	0	4
	1645	47	0	4
	1646	15	0	3
	1647	28	0	3
	1648	42	0	4
	1649	76	0	1
	1650	67	0	1
	1651	91	0	1
	1652	64	0	1
	1653	34	0	3
	1654	92	0	1
	1655	35	0	3
	1656	24	0	3
	1657	13	0	3
	1658	17	0	3
	1659	95	0	1
	1660	10	0	3
	1661	52	0	4
	1662	87	0	1
	1663	48	0	4
	1664	29	0	3
	1665	4	0	3
	1666	3	0	3
	1667	72	0	1
	1668	52	0	4
	1669	61	0	4
	1670	31	0	3
	1671	45	0	4
	1672	71	0	1
	1673	76	0	1
	1674	2	0	2
	1675	12	0	3
	1676	62	0	4
	1677	89	0	1
	1678	13	0	3
	1679	24	0	3
	1680	86	0	1
	1681	95	0	1
	1682	82	0	1
	1683	56	0	4
	1684	35	0	3
	1685	11	0	3
	1686	37	0	4
	1687	41	0	4
	1688	58	0	4
	1689	70	0	1
	1690	91	0	1
	1691	40	0	4
	1692	53	0	4
	1693	85	0	1
	1694	50	0	4
	1695	81	0	1
	1696	77	0	1
	1697	44	0	4
	1698	48	0	4
	1699	83	0	1
	1700	92	0	1
	1701	50	0	4
	1702	78	0	1
	1703	73	0	1
	1704	93	0	1
	1705	88	0	1
	1706	44	0	4
	1707	79	0	1
	1708	68	0	1
	1709	66	0	1
	1710	28	0	3
	1711	55	0	4
	1712	37	0	4
	1713	59	0	4
	1714	84	0	1
	1715	42	0	4
	1716	49	0	4
	1717	29	0	3
	1718	43	0	4
	1719	22	0	3
	1720	47	0	4
	1721	87	0	1
	1722	46	0	4
	1723	52	0	4
	1724	5	0	3
	1725	74	0	1
	1726	36	0	4
	1727	69	0	1
	1728	41	0	4
	1729	59	0	4
	1730	34	0	3
	1731	54	0	4
	1732	57	0	4
	1733	51	0	4
	1734	90	0	1
	1735	39	0	4
	1736	40	0	4
	1737	48	0	4
	1738	94	0	1
	1739	54	0	4
	1740	1	0	2
	1741	57	0	4
	1742	80	0	1
	1743	53	0	4
	1744	60	0	4
	1745	75	0	1
	1746	34	0	3
	1747	35	0	4
	1748	38	0	4
	1749	6	0	3
	1750	62	0	4
	1751	72	0	1
	1752	74	0	1
	1753	41	0	4
	1754	39	0	4
	1755	73	0	1
	1756	52	0	4
	1757	16	0	3
	1758	37	0	4
	1759	2	0	2
	1760	39	0	4
	1761	62	0	4
	1762	71	0	1
	1763	3	0	3
	1764	44	0	4
	1765	24	0	3
	1766	91	0	1
	1767	68	0	1
	1768	95	0	1
	1769	57	0	4
	1770	35	0	3
	1771	10	0	3
	1772	1	0	2
	1773	67	0	1
	1774	42	0	4
	1775	17	0	3
	1776	46	0	4
	1777	51	0	4
	1778	34	0	3
	1779	54	0	4
	1780	75	0	1
	1781	40	0	4
	1782	47	0	4
	1783	44	0	4
	1784	41	0	4
	1785	35	0	4
	1786	52	0	4
	1787	49	0	4
	1788	90	0	1
	1789	60	0	4
	1790	18	0	3
	1791	59	0	4
	1792	36	0	4
	1793	63	0	1
	1794	81	0	1
	1795	23	0	3
	1796	77	0	1
	1797	56	0	4
	1798	45	0	4
	1799	76	0	1
	1800	59	0	4
	1801	65	0	1
	1802	88	0	1
	1803	83	0	1
	1804	85	0	1
	1805	64	0	1
	1806	87	0	1
	1807	33	0	3
	1808	40	0	4
	1809	50	0	4
	1810	53	0	4
	1811	35	0	4
	1812	24	0	3
	1813	15	0	3
	1814	31	0	3
	1815	84	0	1
	1816	78	0	1
	1817	48	0	4
	1818	51	0	4
	1819	89	0	1
	1820	49	0	4
	1821	66	0	1
	1822	50	0	4
	1823	48	0	4
	1824	94	0	1
	1825	82	0	1
	1826	43	0	4
	1827	30	0	3
	1828	28	0	3
	1829	57	0	4
	1830	55	0	4
	1831	79	0	1
	1832	80	0	1
	1833	76	0	1
	1834	48	0	4
	1835	23	0	3
	1836	5	0	3
	1837	43	0	4
	1838	42	0	4
	1839	40	0	4
	1840	35	0	3
	1841	46	0	4
	1842	9	0	3
	1843	86	0	1
	1844	83	0	1
	1845	56	0	4
	1846	90	0	1
	1847	47	0	4
	1848	54	0	4
	1849	56	0	4
	1850	51	0	4
	1851	91	0	1
	1852	36	0	4
	1853	35	0	4
	1854	17	0	3
	1855	37	0	4
	1856	79	0	1
	1857	11	0	3
	1858	37	0	4
	1859	64	0	1
	1860	43	0	4
	1861	34	0	3
	1862	72	0	1
	1863	94	0	1
	1864	78	0	1
	1865	84	0	1
	1866	45	0	4
	1867	81	0	1
	1868	24	0	3
	1869	52	0	4
	1870	55	0	4
	1871	15	0	3
	1872	49	0	4
	1873	42	0	4
	1874	58	0	4
	1875	68	0	1
	1876	74	0	1
	1877	67	0	1
	1878	46	0	4
	1879	70	0	1
	1880	50	0	4
	1881	47	0	4
	1882	77	0	1
	1883	18	0	3
	1884	34	0	3
	1885	26	0	3
	1886	14	0	3
	1887	12	0	3
	1888	52	0	4
	1889	2	0	2
	1890	1	0	2
	1891	27	0	3
	1892	10	0	3
	1893	60	0	4
	1894	85	0	1
	1895	39	0	4
	1896	31	0	3
	1897	75	0	1
	1898	55	0	4
	1899	93	0	1
	1900	59	0	4
	1901	80	0	1
	1902	62	0	4
	1903	95	0	1
	1904	87	0	1
	1905	53	0	4
	1906	57	0	4
	1907	20	0	3
	1908	24	0	3
	1909	57	0	4
	1910	35	0	4
	1911	6	0	3
	1912	41	0	4
	1913	16	0	3
	1914	4	0	3
	1915	8	0	3
	1916	49	0	4
	1917	44	0	4
	1918	92	0	1
	1919	22	0	3
	1920	36	0	4
	1921	69	0	1
	1922	3	0	3
	1923	29	0	3
	1924	19	0	3
	1925	7	0	3
	1926	82	0	1
	1927	65	0	1
	1928	88	0	1
	1929	21	0	3
	1930	63	0	1
	1931	89	0	1
	1932	51	0	4
	1933	73	0	1
	1934	12	0	3
	1935	34	0	3
	1936	40	0	4
	1937	2	0	2
	1938	73	0	1
	1939	51	0	4
	1940	69	0	1
	1941	27	0	3
	1942	49	0	4
	1943	54	0	4
	1944	36	0	4
	1945	49	0	4
	1946	79	0	1
	1947	41	0	4
	1948	59	0	4
	1949	37	0	4
	1950	35	0	4
	1951	16	0	3
	1952	24	0	3
	1953	30	0	3
	1954	35	0	3
	1955	62	0	4
	1956	18	0	3
	1957	88	0	1
	1958	31	0	3
	1959	58	0	4
	1960	90	0	1
	1961	78	0	1
	1962	29	0	3
	1963	95	0	1
	1964	92	0	1
	1965	44	0	4
	1966	72	0	1
	1967	24	0	3
	1968	57	0	4
	1969	80	0	1
	1970	50	0	4
	1971	84	0	1
	1972	82	0	1
	1973	89	0	1
	1974	76	0	1
	1975	20	0	3
	1976	55	0	4
	1977	45	0	4
	1978	10	0	3
	1979	47	0	4
	1980	65	0	1
	1981	94	0	1
	1982	9	0	3
	1983	47	0	4
	1984	54	0	4
	1985	43	0	4
	1986	67	0	1
	1987	60	0	4
	1988	56	0	4
	1989	43	0	4
	1990	53	0	4
	1991	24	0	3
	1992	48	0	4
	1993	71	0	1
	1994	83	0	1
	1995	46	0	4
	1996	52	0	4
	1997	39	0	4
	1998	62	0	4
	1999	86	0	1
[truncated: 3,496 more rows]
